# Supplementary material for: Induction of labour at 41 weeks or expectant management until 42 weeks: A systematic review and an individual participant data meta-analysis of randomised trials
Source: PubMed Central journal article supplement (PMC7723286; doi:10.1371/journal.pmed.1003436), 2020-12-08

# S1 Fig. Aggregate meta-analysis of studies comparing induction of labour with expectant management regarding perinatal mortality

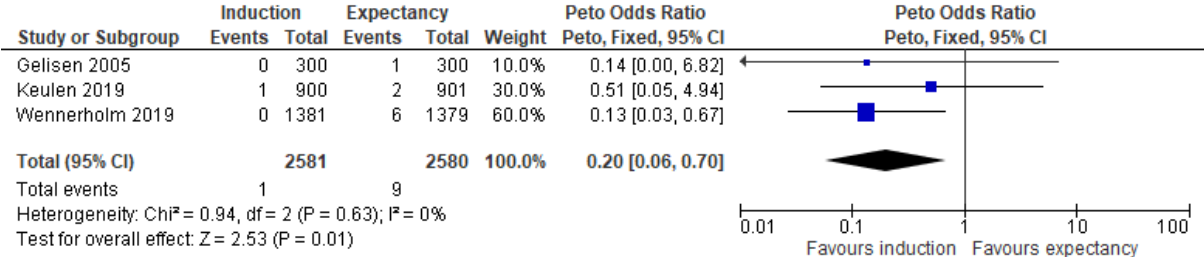

Supplement: pmed.1003436.s001.pdf [file pmed.1003436.s001.pdf]
