# Supplementary material for: Induction of labour at 41 weeks or expectant management until 42 weeks: A systematic review and an individual participant data meta-analysis of randomised trials
Source: PubMed Central journal article supplement (PMC7723286; doi:10.1371/journal.pmed.1003436), 2020-12-08
Supplement: pmed.1003436.s005.pdf [file pmed.1003436.s005.pdf]

**S3 Table. Delivery outcomes per trial in the populations included in the IPD-MA**

| Variable                                          | SWEPIS<br>Induction group<br>(n=1,381) | SWEPIS<br>Expectant<br>management<br>group<br>(n=1,379) | INDEX<br>Induction group<br>(n=900) | INDEX<br>Expectant<br>management<br>group<br>(n=901) |
|---------------------------------------------------|----------------------------------------|---------------------------------------------------------|-------------------------------------|------------------------------------------------------|
| <b>Gestational age at delivery (days)</b>         | <b>n=1,381</b>                         | <b>n=1,379</b>                                          | <b>n=900</b>                        | <b>n=901</b>                                         |
| Median (interquartile range)                      | 289 (283; 297)                         | 292 (286; 297)                                          | 287 (285; 295)                      | 289 (285; 296)                                       |
| <b>Time from randomization to delivery (days)</b> | <b>n=1,381</b>                         | <b>n=1,379</b>                                          | <b>n=900</b>                        | <b>n=901</b>                                         |
| Mean (standard deviation)                         | 1.76 (1.42)                            | 4.66 (2.64)                                             | 2.06 (1.58)                         | 4.16 (3.04)                                          |
| <b>Onset of birth process</b>                     | <b>n=1,381</b>                         | <b>n=1,379</b>                                          | <b>n=900</b>                        | <b>n=901</b>                                         |
| Spontaneous                                       | 195/1,381 (14.1)                       | 920/1,379 (66.7)                                        | 260/900(18.9)                       | 664 (73.7)                                           |
| Induction                                         | 1181/1,381 (85.5)                      | 457/1,379 (33.1)                                        | 640 (71.1)                          | 237 (26.3)                                           |
| Scheduled caesarean delivery                      | 5/1,381 (0.4)                          | 2/1,379 (0.1)                                           | 0                                   | 0                                                    |
| Meconium stained amniotic fluid                   | 233/1238 (18.8)                        | 320/1126 (28.3)                                         | 147/900 (16.4)                      | 205/901 (22.6)                                       |
| Use of oxytocin*                                  | 907/1,381 (65.7)                       | 722/1,379 (52.4)                                        | 533/900 (59.2)                      | 355/901 (39.4)                                       |
| <b>Mode of delivery</b>                           | <b>n=1,381</b>                         | <b>n=1,379</b>                                          | <b>n=900</b>                        | <b>n=901</b>                                         |
| Spontaneous vaginal delivery                      | 1150/1,381 (83.3)                      | 1140/1,379 (82.7)                                       | 710/900 (78.9)                      | 696/901 (77.2)                                       |
| Caesarean delivery                                | 143/1,381 (10.4)                       | 148/1,379 (10.7)                                        | 97/900 (10.8)                       | 97/901 (10.8)                                        |
| Operative vaginal delivery                        | 88/1,381 (6.4)                         | 91/1,379 (6.6)                                          | 93/900 (10.3)                       | 108/901 (12.0)                                       |
| <b>Indication for caesarean delivery</b>          | <b>n=143</b>                           | <b>n=148</b>                                            | <b>n=97</b>                         | <b>n=97</b>                                          |
| Failure to progress <sup>†</sup>                  | 79/143 (55.2)                          | 83/148 (56.1)                                           | 41/97 (42.3)                        | 39/97 (40.2)                                         |
| Suspected foetal distress                         | 41/143 (28.7)                          | 36/148 (24.3)                                           | 24/97 (24.7)                        | 21/97 (21.6)                                         |
| Suspected foetal distress and failure to progress | 6/143 (4.2)                            | 10/148 (6.8)                                            | 11/97 (11.3)                        | 11/97 (11.3)                                         |
| Failed operative vaginal delivery                 | 7/143 (4.9)                            | 12/148 (8.1)                                            | 6/97 (6.2)                          | 12/97 (12.4)                                         |
| Other <sup>‡</sup>                                | 10/143 (7.0)                           | 7/148 (4.7)                                             | 15/97 (15.5)                        | 14/97 (14.4)                                         |
| <b>Indication for operative vaginal delivery</b>  | <b>n=88</b>                            | <b>n=91</b>                                             | <b>n=93</b>                         | <b>n=108</b>                                         |
| Failure to progress <sup>§</sup>                  | 50/88 (56.8)                           | 49/91 (53.8)                                            | 39/93 (41.9)                        | 49/108 (45.4)                                        |
| Foetal distress                                   | 33/88 (37.5)                           | 34/91 (37.4)                                            | 43/93 (46.2)                        | 37/108 (34.3)                                        |
| Foetal distress and Failure to progress           | 5/88 (5.7)                             | 7/91 (7.7)                                              | 10/93 (10.8)                        | 22/108 (20.4)                                        |
| Maternal complication                             | 0/88 (0.0)                             | 1/91 (1.1)                                              | 1/93 (1.1)                          | 0/108 (0.0)                                          |

Values are numbers (percentages) unless stated otherwise.

\*Both induction and/or labour augmentation

<sup>†</sup>Including failed induction

<sup>‡</sup>Including scheduled due to e.g. undetected breech or transverse presentation/maternal indication

<sup>§</sup>Including maternal distress
