# Supplementary material for: Induction of labour at 41 weeks or expectant management until 42 weeks: A systematic review and an individual participant data meta-analysis of randomised trials
Source: PubMed Central journal article supplement (PMC7723286; doi:10.1371/journal.pmed.1003436), 2020-12-08
Supplement: pmed.1003436.s006.pdf [file pmed.1003436.s006.pdf]

**S4 Table. Maternal outcomes per trial in the populations included in the IPD-MA**

| Variable                                         | SWEPIS<br>Induction group<br>(n=1,381) | SWEPIS<br>Expectant<br>management<br>group<br>(n=1,379) | INDEX<br>Induction group<br>(n=900) | INDEX<br>Expectant<br>management<br>group<br>(n=901) |
|--------------------------------------------------|----------------------------------------|---------------------------------------------------------|-------------------------------------|------------------------------------------------------|
| Pain treatment (use of epidural/spinal/opiates)* | 733/1,381 (53.1)                       | 675/1,379 (48.9)                                        | 420/900 (46.7)                      | 383/901 (42.5)                                       |
| Use of epidural anaesthesia                      | 733/1,381 (53.1)                       | 675/1,379 (48.9)                                        | 265/900 (29.4)                      | 231/901 (25.6)                                       |
| Use of opiates                                   | 0/1,381 (0.0)                          | 0/1,379 (0.0)                                           | 184/900 (20.4)                      | 173/901 (19.2)                                       |
| Fever during labour                              | 127/1,381 (9.2)                        | 105/1,379 (7.6)                                         | 50/900 (5.6)                        | 46/901 (5.1)                                         |
| Antibiotics during labour                        | 248/1,381 (18.0)                       | 262/1,379 (19.0)                                        | 48/900 (5.3)                        | 35/901 (3.9)                                         |
| Therapy                                          | 95/1,381 (6.9)                         | 80/1,379 (5.8)                                          | 33/900 (3.7)                        | 24/901 (2.7)                                         |
| Prophylaxis                                      | 153/1,381 (11.1)                       | 182/1,379 (13.2)                                        | 15/900 (1.7)                        | 11/901 (1.3)                                         |
| Episiotomy <sup>†</sup>                          | 89/1,381 (6.4)                         | 84/1,379 (6.1)                                          | 239/900 (26.6)                      | 251/901 (27.9)                                       |
| Perineal lacerations III-IV <sup>‡</sup>         | 40/1,381 (2.9)                         | 50/1,379 (3.6)                                          | 28/900 (3.1)                        | 31/901 (3.4)                                         |
| Postpartum haemorrhage (>1000 ml) <sup>§</sup>   | 131/1377 (9.5)                         | 145/1375 (10.5)                                         | 77/900 (9.1)                        | 59/901 (8.0)                                         |
| Postpartum haemorrhage (>2000 ml) <sup>§</sup>   | 27/1,381 (2.0)                         | 18/1,379 (1.3)                                          | 15/900 (3.0)                        | 16/901 (2.6)                                         |
| Retained placenta (all)                          | 52/1,381 (3.8)                         | 57/1,379 (4.1)                                          | 41/900 (4.6)                        | 33/901 (3.7)                                         |
| Retained placenta with haemorrhage >1000 ml      | 36/1,381 (2.6)                         | 36/1,379 (2.6)                                          | 26/900 (2.9)                        | 25/901 (2.8)                                         |
| Retained placenta with haemorrhage ≤1000 ml      | 16/1,381 (1.2)                         | 21/1,379 (1.5)                                          | 15/900 (1.7)                        | 8/901 (0.9)                                          |
| Hypertensive disorders <sup>¶</sup>              | 19/1,381 (1.4)                         | 42/1,379 (3.0)                                          | 7/900 (0.6)                         | 24/901 (1.6)                                         |
| Maternal venous thromboembolism                  | 0/1,381 (0.0)                          | 1/1,379 (0.1)                                           | 0/900 (0.0)                         | 0/901 (0.0)                                          |
| Maternal admission to intensive care unit        | 2/1,381(0.1)                           | 0/1,381 (0.0)                                           | 3/900 (0.3)                         | 2/901 (0.2)                                          |
| Maternal death                                   | 0/1,381 (0.0)                          | 0/1,379 (0.0)                                           | 0/900 (0.0)                         | 0/901 (0.0)                                          |

Values are numbers (percentages) unless stated otherwise.

\*In the INDEX trial a combination of epidural and opiates was possible

<sup>†</sup>With and without perineal lacerations III-IV

<sup>‡</sup>With and without episiotomy

<sup>§</sup>Based on measured blood loss and not International Classification of Diseases 10th Revision codes reported

<sup>¶</sup>Hypertensive disorders of pregnancy including eclampsia and HELLP
